# Supplementary material for: Associations of Residential Brownness and Greenness with Fasting Glucose in Young Healthy Adults Living in the Desert
Source: Int J Environ Res Public Health. 2021 Jan 10;18(2):520. doi: 10.3390/ijerph18020520 (PMC7826883; doi:10.3390/ijerph18020520)
Supplement: Supplementary file 1 [file ijerph-18-00520-s001.pdf]

## Supplemental Materials

Table S1: Participant characteristics by quartiles of brownness within 250m of their primary residence.

| Characteristic                               | Brownness Q1 | Brownness Q2 | Brownness Q3 | Brownness Q4 | ANOVA F-test<br>p-value |
|----------------------------------------------|--------------|--------------|--------------|--------------|-------------------------|
| Participants, n                              | 114          | 114          | 114          | 114          |                         |
| Age (years), mean±SD                         | 23.82±4.18   | 23.54±3.84   | 24.82±5.21   | 24.62±4.70   | 0.10                    |
| BMI (kg/m <sup>2</sup> ), mean±SD            | 25.90±5.93   | 25.06±5.59   | 25.18±4.97   | 25.38±4.91   | 0.65                    |
| Male, n (%)                                  | 23 (20.2)    | 25 (21.9)    | 22 (19.3)    | 22 (19.3)    | 0.96                    |
| Race, n (%)                                  |              |              |              |              | 0.35                    |
| American Indian or Alaska Native             | 1 (0.9)      | 4 (3.5)      | 1 (0.9)      | 4 (3.5)      |                         |
| Asian                                        | 0 (0)        | 5 (4.4)      | 3 (2.6)      | 1 (0.9)      |                         |
| Black or African American                    | 4 (3.5)      | 1 (0.9)      | 3 (2.6)      | 3 (2.6)      |                         |
| Native Hawaiian or Other Pacific Islander    | 1 (0.9)      | 0 (0)        | 0 (0)        | 0 (0)        |                         |
| White                                        | 108 (94.7)   | 104 (93.9)   | 107 (91.2)   | 106 (94.7)   |                         |
| Hispanic or Latino, n (%)                    | 103 (90.4)   | 106 (93.0)   | 99 (86.8)    | 105 (92.1)   | 0.40                    |
| Maternal Education, n (%)                    |              |              |              |              | 0.005                   |
| No High School                               | 11 (9.6)     | 7 (6.1)      | 12 (10.5)    | 19 (16.7)    |                         |
| Some High School                             | 5 (4.4)      | 9 (7.9)      | 6 (5.3)      | 15 (13.2)    |                         |
| High School Graduate                         | 26 (22.8)    | 20 (17.5)    | 25 (21.9)    | 25 (21.9)    |                         |
| Some College                                 | 36 (31.6)    | 41 (36.0)    | 27 (23.7)    | 25 (21.9)    |                         |
| College graduate                             | 35 (30.7)    | 37 (32.5)    | 42 (36.9)    | 28 (24.6)    |                         |
| Income/Poverty*, mean±SD                     | 2.26±1.94    | 2.11±1.65    | 2.43±1.91    | 2.30±1.84    | 0.67                    |
| Physical activity* (MET hours/week), mean±SD | 54.43±57.86  | 54.45±49.38  | 73.30±93.12  | 72.95±84.92  | 0.07                    |
| Sleep (hours)*, mean±SD                      | 6.38±1.08    | 6.51±1.06    | 6.24±0.99    | 6.41±1.20    | 0.74                    |

\*Information on income over poverty ratio, physical activity, and sleep duration was missing for 67(14.6%), 6(1.3%) and 46(10.1%) participants respectively.

Table S2: Summary Statistics for greenness, brownness and grayness values within 250m, 500m, 1000m and 3000m of primary residence. Values presented as percentages of total with the sum of greenness, brownness and grayness totaling 100% for each individual.

| Buffer<br>Size | Greenness  |                     | Brownness   |                      | Grayness    |                      |
|----------------|------------|---------------------|-------------|----------------------|-------------|----------------------|
|                | mean±SD    | median (IQR)        | mean±SD     | median (IQR)         | mean±SD     | median (IQR)         |
| 250m           | 10.62±3.17 | 10.22 (8.58, 11.48) | 50.86±17.13 | 45.73 (38.80, 60.30) | 38.53±17.23 | 42.83 (28.88, 50.81) |
| 500m           | 10.73±2.93 | 10.13 (8.88, 11.67) | 52.39±16.76 | 48.27 (40.26, 63.06) | 36.87±17.58 | 41.01 (26.20, 49.24) |
| 1000m          | 10.82±2.66 | 10.19 (9.16, 11.60) | 53.63±17.00 | 50.30 (41.05, 66.13) | 35.54±17.71 | 38.84 (22.58, 48.17) |
| 3000m          | 10.90±2.10 | 10.40 (9.62, 11.32) | 56.01±18.23 | 56.42 (45.53, 70.29) | 33.09±18.70 | 32.82 (19.07, 43.78) |

Table S3: Associations between glucose levels and greenness, brownness and impervious surface area. Results shown at the 500m, 1000m and 3000m buffers, from models\* including exposure measures separately, and models\* with each combination of two of the exposure measures.

| Exposure variable      | Change in Glucose, mg/dL (95% CI) |                     |                    |
|------------------------|-----------------------------------|---------------------|--------------------|
|                        | Greenness                         | Brownness           | Grayness           |
| 500m buffer            |                                   |                     |                    |
| Individual models      | -0.32 (-0.65, 0.02)               | -0.02 (-0.08, 0.04) | 0.02 (-0.04, 0.08) |
| Greenness + brownness  | -0.31 (-0.65, 0.02)               | -0.01 (-0.07, 0.05) | .                  |
| Greenness + Impervious | -0.30 (-0.65, 0.04)               | .                   | 0.01 (-0.05, 0.07) |
| Brownness + Impervious | .                                 | 0.30 (-0.05, 0.65)  | 0.32 (-0.03, 0.65) |
| 1000m buffer           |                                   |                     |                    |
| Individual models      | -0.38 (-0.75, -0.01)              | -0.03 (-0.09, 0.03) | 0.03 (-0.02, 0.09) |
| Greenness + brownness  | -0.36 (-0.74, 0.01)               | -0.02 (-0.08, 0.04) | .                  |
| Greenness + Impervious | -0.34 (-0.73, 0.04)               | .                   | 0.02 (-0.04, 0.08) |
| Brownness + Impervious | .                                 | 0.34 (-0.04, 0.73)  | 0.36 (-0.01, 0.74) |
| 3000m buffer           |                                   |                     |                    |
| Individual models      | -0.23 (-0.70, 0.22)               | -0.02 (-0.07, 0.04) | 0.02 (-0.03, 0.07) |
| Greenness + brownness  | -0.22 (-0.69, 0.25)               | -0.01 (-0.07, 0.04) | .                  |
| Greenness + Impervious | -0.21 (-0.69, 0.28)               | .                   | 0.01 (-0.04, 0.07) |
| Brownness + Impervious | .                                 | 0.21 (-0.28, 0.69)  | 0.22 (-0.25, 0.69) |

\*All models adjusted for age, gender, race/ethnicity, ratio of household income over poverty and maternal education.  
Effect estimates for linear terms are for a 0.01 (1%) increase

Table S4: Associations between fasting glucose levels and potential intermediates. Results shown with greenness measured at the 250m buffer size included in the model.

| Potential mediator                          | Change in glucose in mg/dL (95% CI) |
|---------------------------------------------|-------------------------------------|
| BMI (per kg/m <sup>3</sup> )                | 0.35 (0.16, 0.54)                   |
| Physical activity                           |                                     |
| Binary variable*                            | -0.59 (-3.86, 2.68)                 |
| Continuous (per 100 MET mins/week increase) | -0.02 (-0.04, 0.01)                 |
| Sleep quality*                              | -1.80 (-3.81, 0.21)                 |
| Sleep duration (per hour increase)          | -0.20 (-1.14, 0.74)                 |

\*Binary variables defined as physical activity as  $\geq$  and  $<500$  MET mins/week, and sleep quality (self-reported 'strongly agree' or 'agree' with good quality of sleep compared to 'neutral', 'disagree' or 'strongly disagree').

Table S5: Associations between fasting glucose levels and greenness, brownness and grayness at the 250m buffer size with additional covariates in the model. Effects presented per 0.01 (1%) increase in exposure values.

| Additional covariate                | Change in glucose in mg/dL (95% CI) |                      |                    |
|-------------------------------------|-------------------------------------|----------------------|--------------------|
|                                     | Brownness                           | Greenness            | Grayness           |
| Base model                          | -0.01 (-0.07, 0.05)                 | -0.32 (-0.63, -0.01) | 0.02 (-0.04, 0.08) |
| + BMI (per kg/m <sup>3</sup> )      | -0.01 (-0.07, 0.05)                 | -0.38 (-0.69, -0.07) | 0.02 (-0.03, 0.08) |
| + Physical activity                 |                                     |                      |                    |
| As binary variable*                 | -0.01 (-0.07, 0.05)                 | -0.31 (-0.63, 0.00)  | 0.02 (-0.03, 0.08) |
| As continuous (MET minutes/week)    | -0.01 (-0.07, 0.05)                 | -0.32 (-0.63, -0.01) | 0.02 (-0.04, 0.08) |
| + Sleep quality*                    | -0.01 (-0.07, 0.05)                 | -0.31 (-0.62, 0.00)  | 0.02 (-0.03, 0.08) |
| +Sleep duration (per hour increase) | -0.00 (-0.06, 0.06)                 | -0.29 (-0.64, 0.05)  | 0.01 (-0.05, 0.07) |

\*Binary variables defined as physical activity as  $\geq$  and  $<500$  MET mins/week, and sleep quality (self-reported 'strongly agree' or 'agree' with good quality of sleep compared to 'neutral', 'disagree' or 'strongly disagree').
